# Supplementary material for: Protective Effects of Euphrasia officinalis Extract against Ultraviolet B-Induced Photoaging in Normal Human Dermal Fibroblasts
Source: PubMed Central journal article supplement (PMC6275060; doi:10.3390/ijms19113327), 2018-10-25
Supplement: ijms-19-03327-s001.pdf [file ijms-19-03327-s001.pdf]

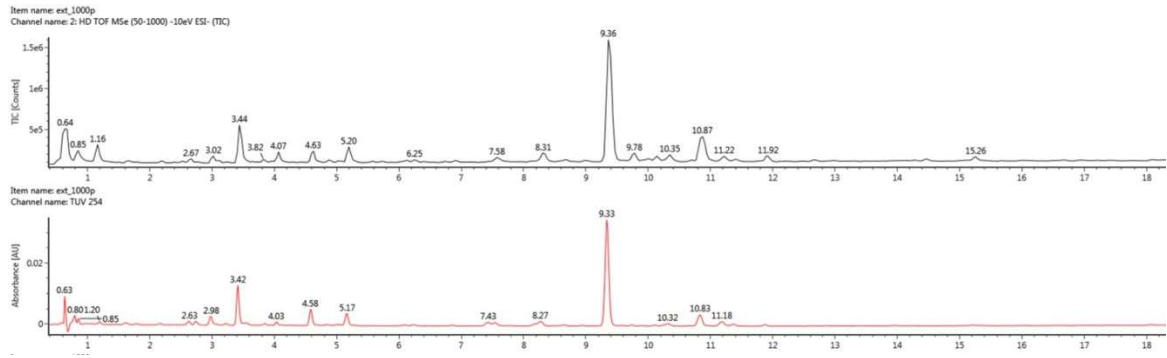

**Figure S1.** The identified components in *E. officinalis* ethanol extract using UPLC-QTOF-MS.

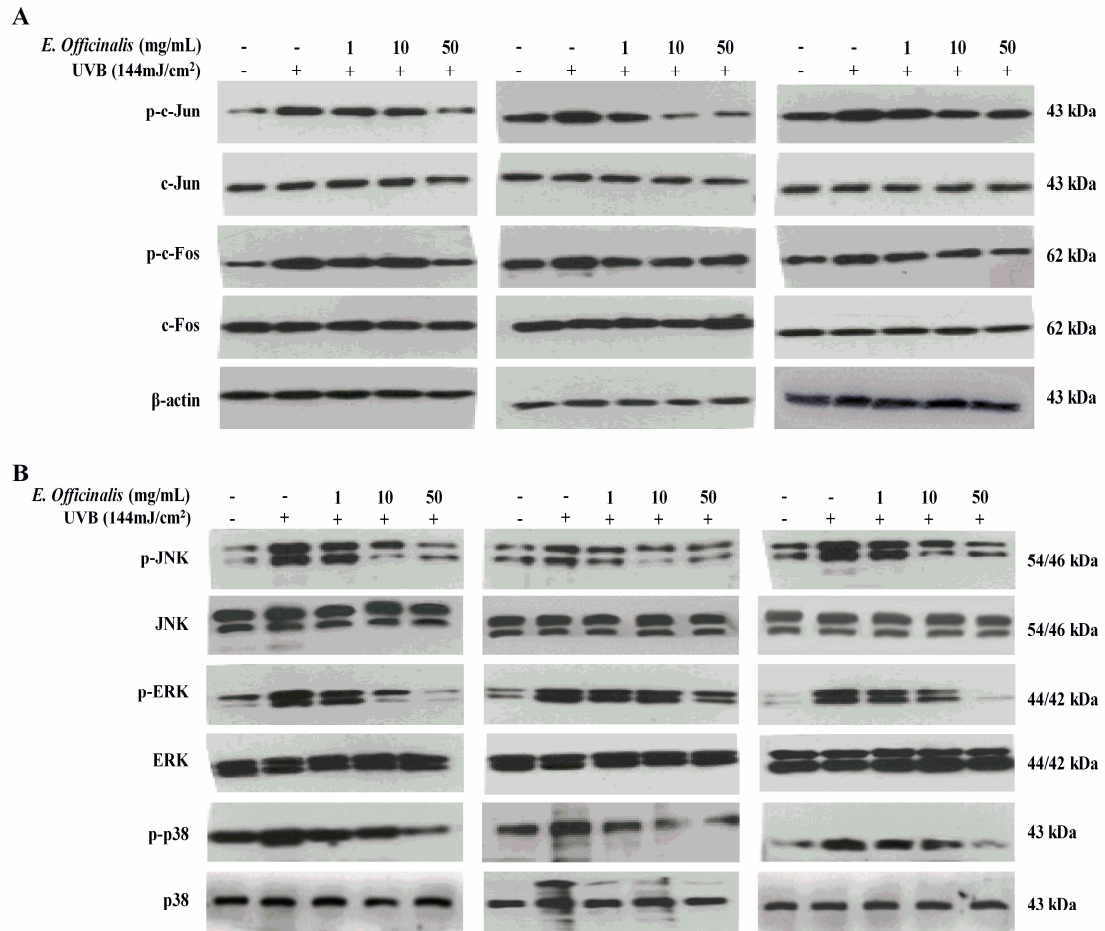

**Figure S2.** The original Western blot images related to this article in triplicate. **(A)** Effect of *E. officinalis* on activator protein 1 (AP-1) signaling-related proteins; **(B)** Effect of *E. officinalis* on mitogen-activated protein kinase (MAPK) signaling-related proteins.

**Table S1.** QTOF-MS data of identified components in *E. officinalis* ethanol extract.

| Formula                                         | Neutral Mass (Da) | Observed Neutral Mass (Da) | Observed <i>m/z</i> | Mass Error (mDa) | Mass Error (ppm) | Observed RT (min) | Observed CCS (Å <sup>2</sup> ) | Detector Counts | Response | Adducts | Identification     |
|-------------------------------------------------|-------------------|----------------------------|---------------------|------------------|------------------|-------------------|--------------------------------|-----------------|----------|---------|--------------------|
| C <sub>9</sub> H <sub>8</sub> O <sub>4</sub>    | 180.0423          | 180.042                    | 179.035             | -0.2             | -1.3             | 2.78              | 218.12                         | 1117            | 1024     | -H      | Caffeic acid       |
| C <sub>27</sub> H <sub>30</sub> O <sub>16</sub> | 610.1534          | 610.1538                   | 609.147             | 0.4              | 0.6              | 7.59              | 231.96                         | 3345            | 2548     | -H      | Rutin              |
| C <sub>21</sub> H <sub>20</sub> O <sub>11</sub> | 448.1006          | 448.1007                   | 447.093             | 0.1              | 0.2              | 8.3               | 210.51                         | 7564            | 6015     | -H      | Luteolin-glucoside |
| C <sub>29</sub> H <sub>36</sub> O <sub>15</sub> | 624.2054          | 624.2045                   | 623.197             | -0.9             | -1.4             | 9.38              | 265.76                         | 17,677          | 13,942   | -H      | Acteoside          |
